# Supplementary material
Source: bioRxiv or medRxiv preprint supplement (https://www.biorxiv.org/content/biorxiv/early/2022/12/23/2022.12.23.521750/DC4/embed/media-4.pdf)

◆ DMD paravertebralis

● DMD leg muscle

◆ Healthy paravertebralis

● Healthy leg muscle

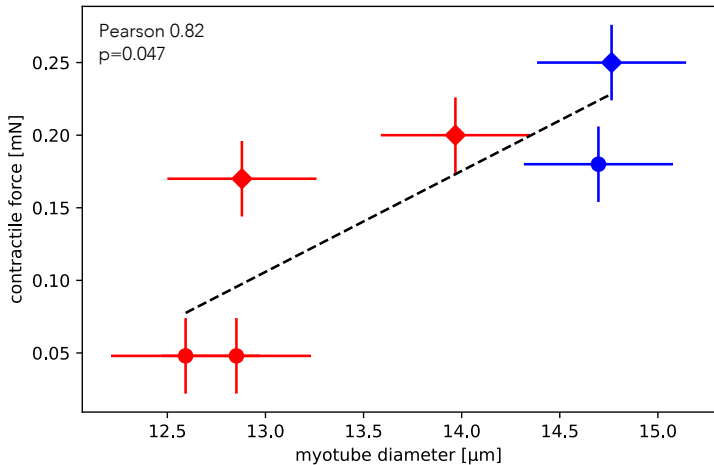

Supplement: Supplementary file [file media-4.pdf]
